# Supplementary material
Source: PubMed Central journal article supplement (PMC2807330)

Supplemental Figure S1

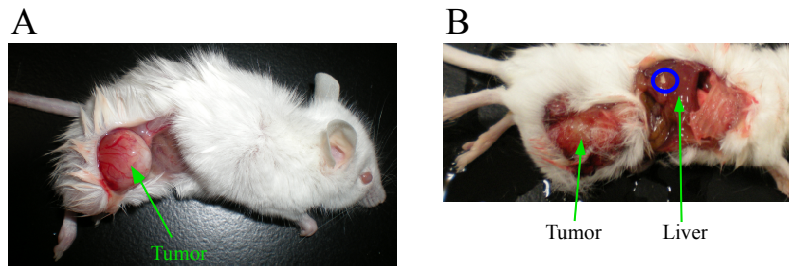

Supplement: supp_M109.075374_jbc.M109.075374-2.pdf [file supp_M109.075374_jbc.M109.075374-2.pdf]

## Supplemental Figure S2

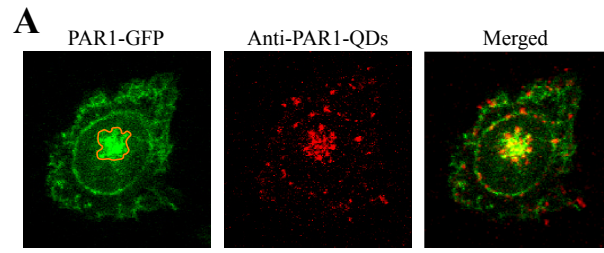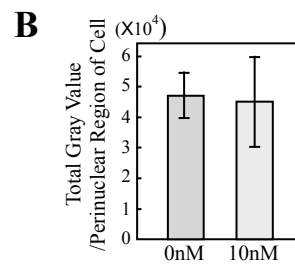

Supplement: supp_M109.075374_jbc.M109.075374-3.pdf [file supp_M109.075374_jbc.M109.075374-3.pdf]

Supplemental Figure S3

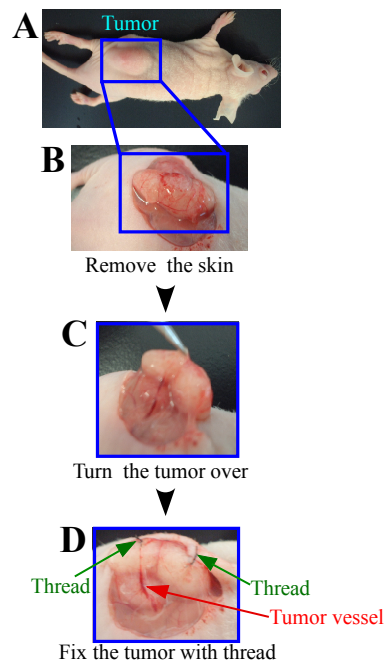

Supplement: supp_M109.075374_jbc.M109.075374-4.pdf [file supp_M109.075374_jbc.M109.075374-4.pdf]

Supplemental Figure S4

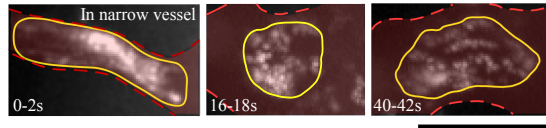

Supplement: supp_M109.075374_jbc.M109.075374-5.pdf [file supp_M109.075374_jbc.M109.075374-5.pdf]

# Supplemental Figure S5

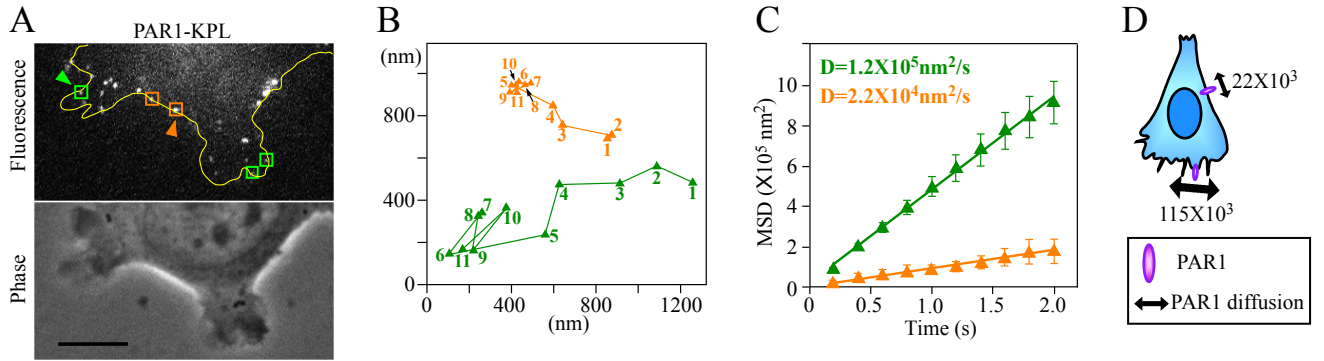

Supplement: supp_M109.075374_jbc.M109.075374-6.pdf [file supp_M109.075374_jbc.M109.075374-6.pdf]
